# Supplementary material for: Reversible senescence of human colon cancer cells after blockage of mitosis/cytokinesis caused by the CNF1 cyclomodulin from Escherichia coli
Source: PubMed Central journal article supplement (PMC6290797; doi:10.1038/s41598-018-36036-5), 2018-12-12
Supplement: 41598_2018_36036_MOESM1_ESM.pdf [file 41598_2018_36036_MOESM1_ESM.pdf]

Supplementary Information

**Reversible senescence of human colon cancer cells after  
blockage of mitosis/cytokinesis caused by the CNF1  
cyclomodulin from *Escherichia coli***

Zhen Zhang<sup>1#</sup>, Kyaw Min Aung<sup>1</sup>, Bernt Eric Uhlin<sup>1</sup>, Sun Nyunt Wai<sup>1#</sup>

<sup>1</sup>Department of Molecular Biology and The Laboratory for Molecular  
Infection Medicine Sweden (MIMS) Umeå University, SE-90187 Umeå,  
Sweden.

# Corresponding authors:

E-mail: [sun.nyunt.wai@umu.se](mailto:sun.nyunt.wai@umu.se)

E-mail: [zhen.zhang@helsinki.fi](mailto:zhen.zhang@helsinki.fi)

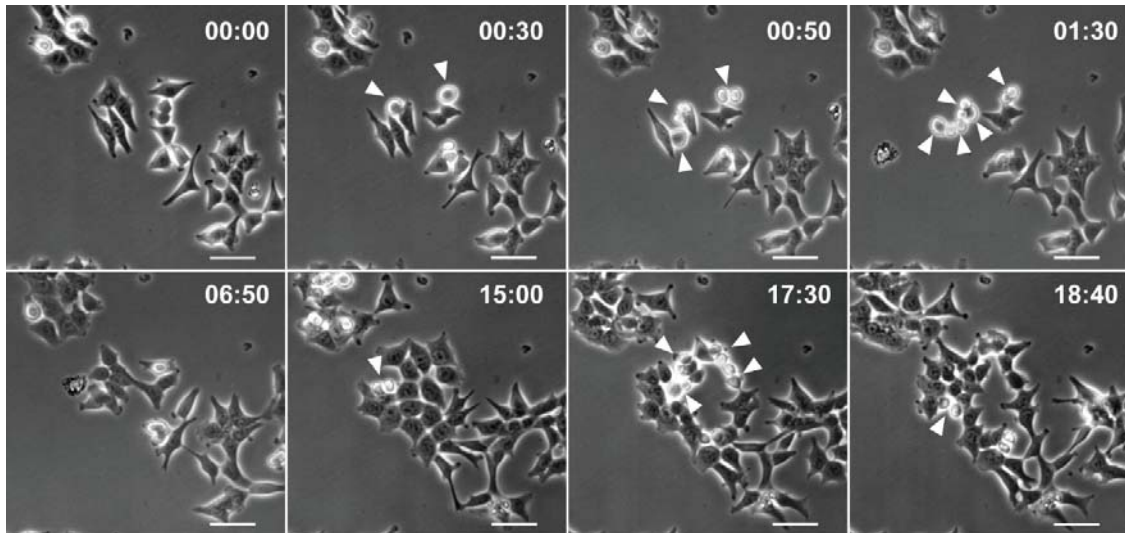

**Figure S1.** Representative time-lapse images of proliferation in HCT-116 without CNF1 treatment. Time is indicated in hours and minutes (h:min). White arrowheads indicate cells undergoing mitosis and cell division. Bars, 50  $\mu\text{m}$ .

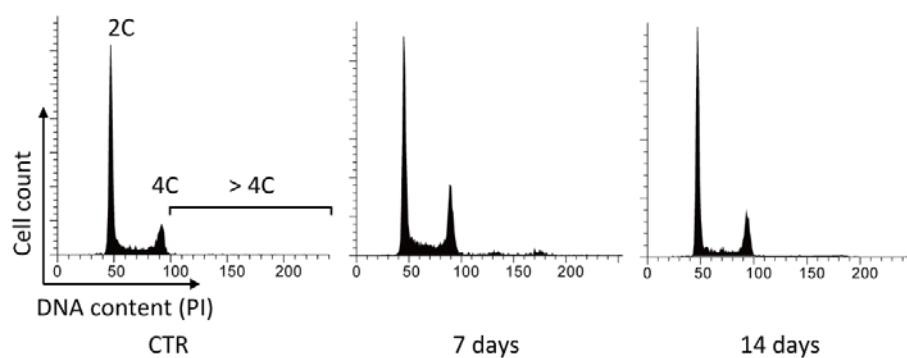

**Figure S2.** DNA content analysis of HCT-116 untreated cells and polyploid HCT-116 cell-derived daughter cells after 7 and 14 days recovery.

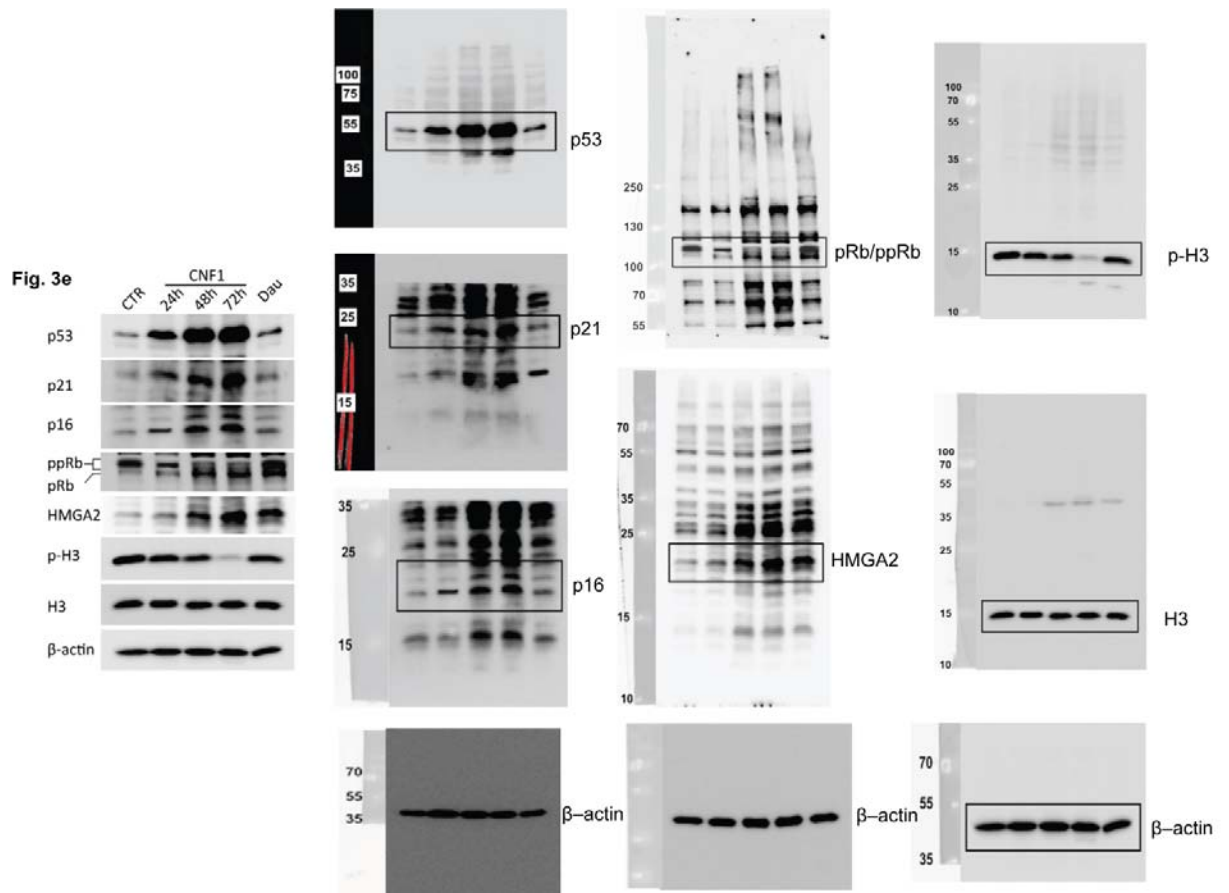

**Figure S3.** Full-length immunoblots of antibodies that are tested in this study. The immunoreactive bands are determined with protein marker. The cropped area of immunoblot in Fig. 3e is indicated by a black rectangle. The  $\beta$ -actin antibody has been three times, did not show any significant difference. One representative immunoblot of  $\beta$ -actin is presented in Fig. 3e.

### **Supplementary Movie Legends**

**Movie S1.** Representative time-lapse movie of CNF1-induced endoreplication in HCT-116. Time is indicated in hours and minutes (h:min). Bars, 50  $\mu\text{m}$ .

**Movie S2.** Representative time-lapse movie of proliferation in HCT-116 without CNF1 treatment. Time is indicated in hours and minutes (h:min). Bars, 50  $\mu\text{m}$ .

**Movie S3.** Representative time-lapse movie of depolyploidisation of polyploid HCT-116 cells in the first 7 days after CNF1 treatment. Time is indicated in hours and minutes (h:min). Bars, 50  $\mu\text{m}$ .

**Movie S4.** Representative time-lapse images of depolyploidisation of polyploid HCT-116 cells in the second 7 days after CNF1 treatment. Time is indicated in hours and minutes (h:min). Bars, 50  $\mu\text{m}$ .
